# Supplementary material for: Mesoporous PdBi nanocages for enhanced electrocatalytic performances by all-direction accessibility and steric site activation
Source: Royal Society of Chemistry journal article supplement (doi:10.1039/d1sc06314f), 2022-01-01
Supplement: d1sc06314f1.pdf [file d1sc06314f1.pdf]

Mesoporous PdBi Nanocages for Enhanced Electrocatalytic Performances by All-Direction  
Accessibility and Steric Site Activation

Dawei Du,<sup>a</sup> Qinghong Geng,<sup>a</sup> Lian Ma,<sup>a</sup> Siyu Ren,<sup>a</sup> Jun-Xuan Li,<sup>a</sup> Weikang Dong,<sup>b</sup> Qingfeng Hua,<sup>a</sup>  
Longlong Fan,<sup>a</sup> Ruiwen Shao,<sup>b</sup> Xiaoming Wang,<sup>c</sup> Cuiling Li,<sup>\*a</sup> and Yusuke Yamauchi,<sup>\*d,e</sup>

<sup>a</sup>Key Laboratory of Cluster Science, Ministry of Education, Beijing Key Laboratory of  
Photoelectronic/Electrophotonic Conversion Materials, School of Chemistry and Chemical  
Engineering, Beijing Institute of Technology, Beijing 100081, China

<sup>b</sup>Beijing Advanced Innovation Center for Intelligent Robots and Systems and Institute of  
Engineering Medicine, Beijing Institute of Technology, Beijing 100081, China

<sup>c</sup>Key Laboratory for Preparation and Application of Ordered Structural Materials of Guangdong  
Province, Department of Chemistry, Shantou University, Shantou 515063, China

<sup>d</sup>International Center for Materials Nanoarchitectonics (MANA), National Institute for Materials  
Science (NIMS), Tsukuba 305-0044, Japan

E-mail: y.yamauchi@uq.edu.au

<sup>e</sup>School of Chemical Engineering and Australian Institute for Bioengineering and Nanotechnology  
(AIBN), The University of Queensland, Brisbane 4072, Australia

E-mail: licuiling@bit.edu.cn

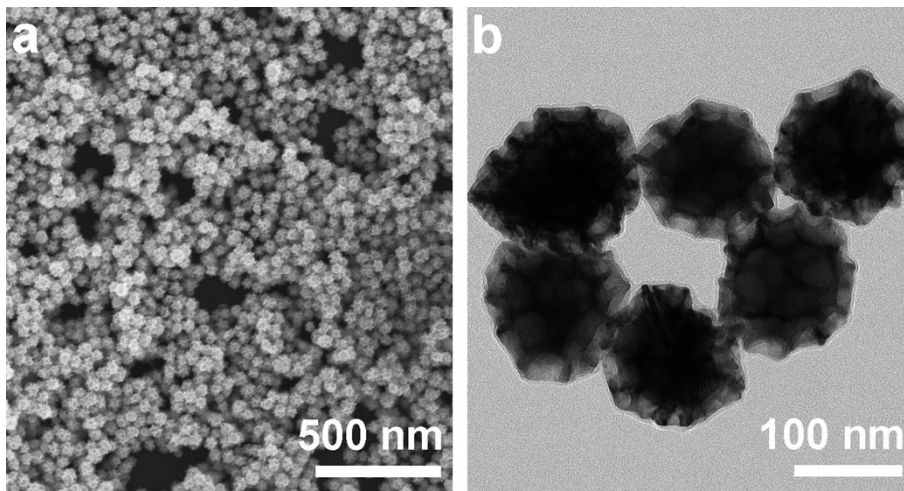

**Figure S1** (a) SEM and (b) TEM images of the prepared nanoparticles before etching treatment.

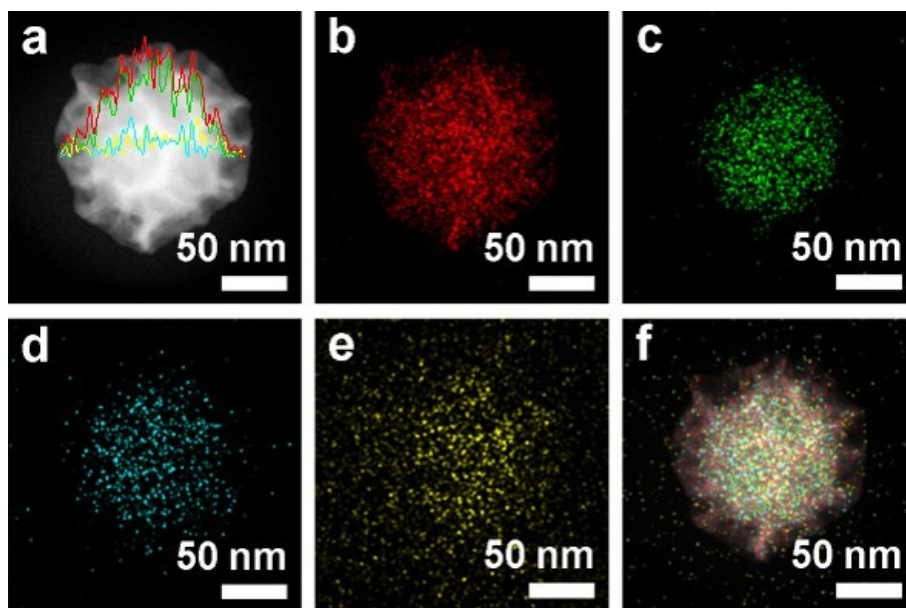

**Figure S2** (a) HAADF-STEM image and corresponding elemental maps: (b) Pd, (c) Bi, (d) Cl, (e) O and (f) overlap. Line profiles of elements across the whole nanoparticle are shown in panel (a).

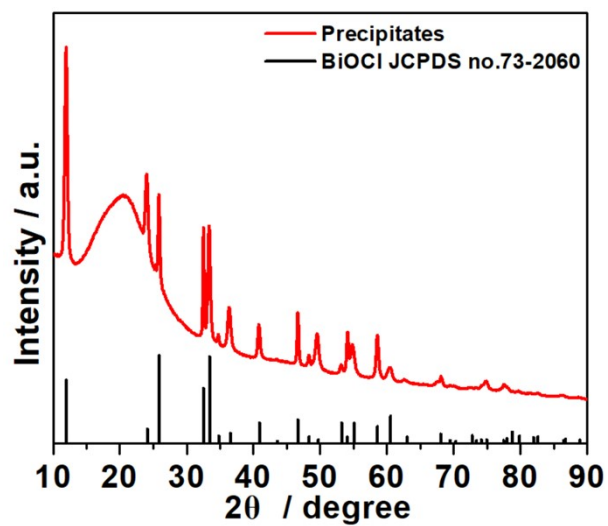

**Figure S3** XRD patterns of the initial precipitates formed under the reaction condition.

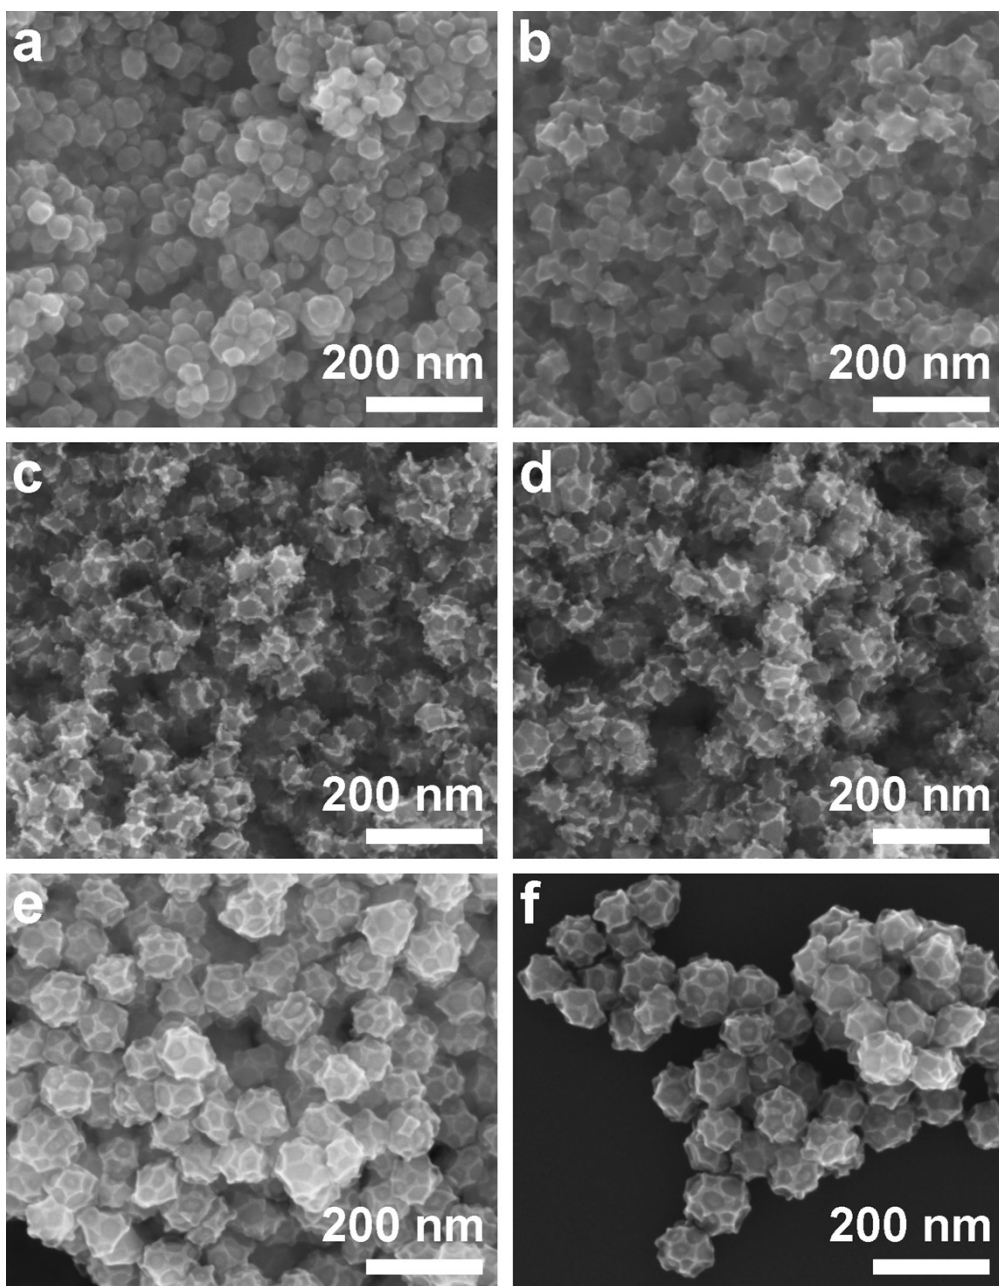

**Figure S4** Typical SEM images of the products collected at different reaction times: (a) 2 min, (b) 3 min, (c) 5 min, (d) 8 min, (e) 15 min, and (f) 30 min.

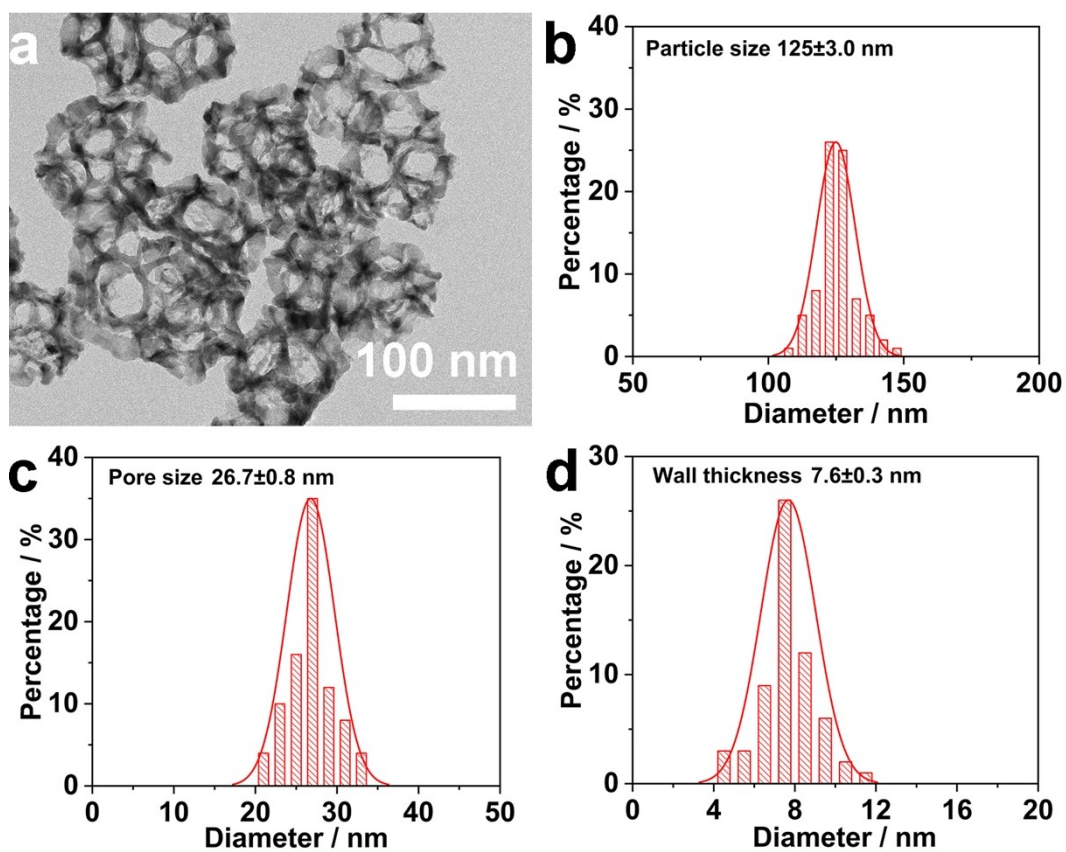

**Figure S5** (a) TEM image of mesoporous nanocages and histograms of (b) particle size, (c) pore size and (d) wall thickness distributions.

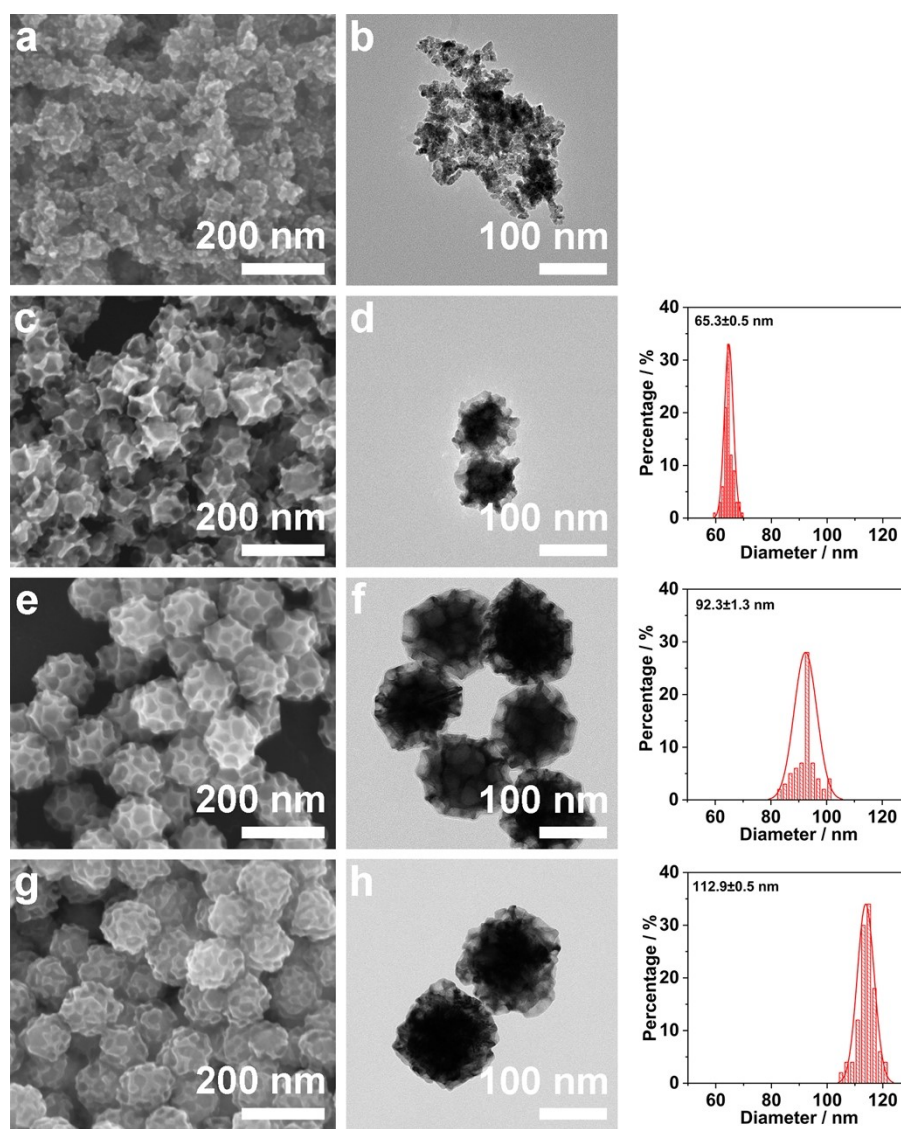

**Figure S6** (a, c, e, g) SEM and (b, d, f, h) TEM images of the mesoporous nanoparticles after adding different amount of HCl: (a, b) 0 mL, (c, d) 0.05 mL, (e, f) 0.1 mL and (g, h) 0.2 mL, respectively. The histograms of core size distributions are displayed in the right column.

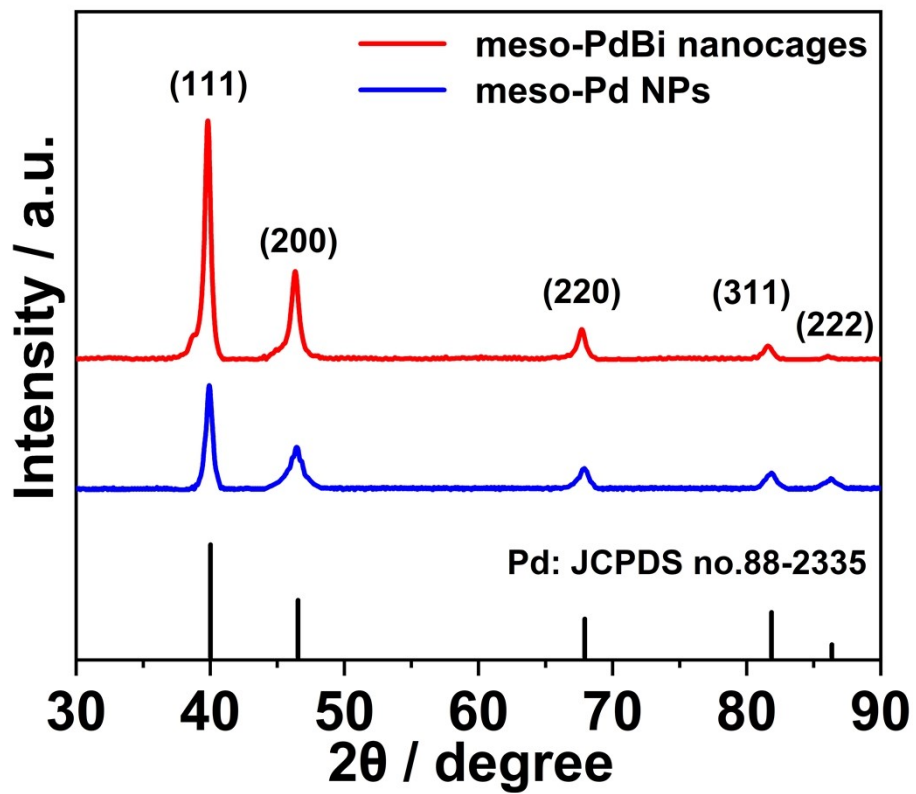

Figure S7 XRD patterns of meso-PdBi nanocages and meso-Pd NPs.



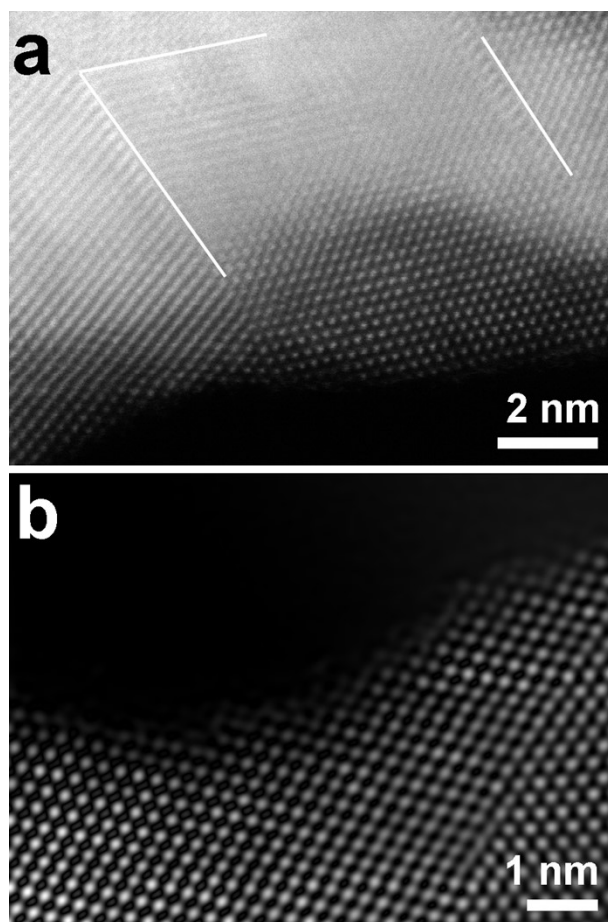

**Figure S8** (a) Aberration-corrected HAADF-STEM images of different locations on the meso-PdBi nanocages. (b) A clear image on the concave curvature.

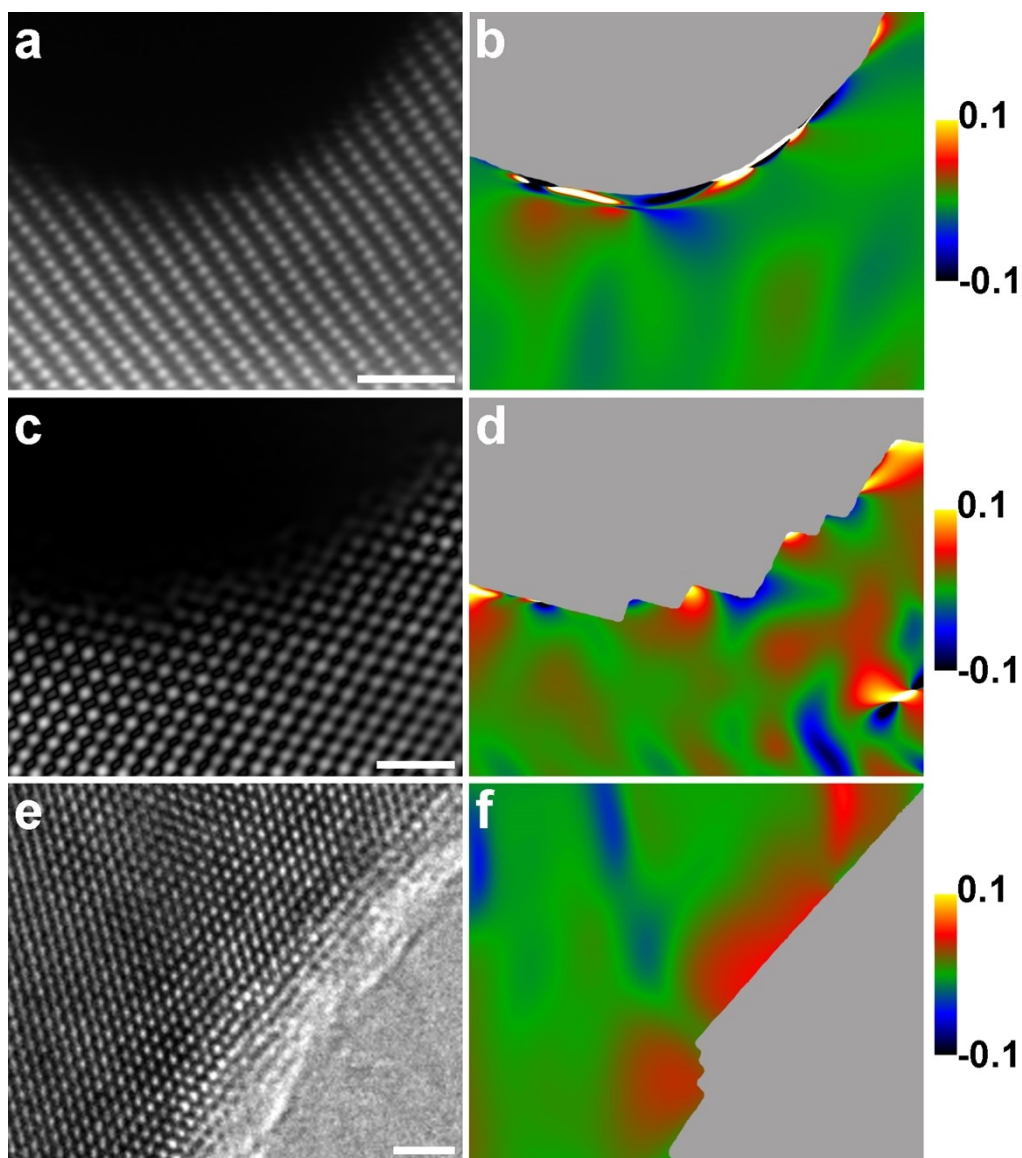

**Figure S9** (a, c, e) Representative aberration-corrected HAADF images of surface structures of (a, c) meso-PdBi nanocages and (e) meso-Pd NPs, respectively. (b, d, f) Strain maps of  $\epsilon_{xx}$  obtained by geometrical phase analysis (GPA) for (b, d) meso-PdBi nanocages and (f) meso-Pd NPs. Negative values represent compressive strain, while positive values depict tensile strain.

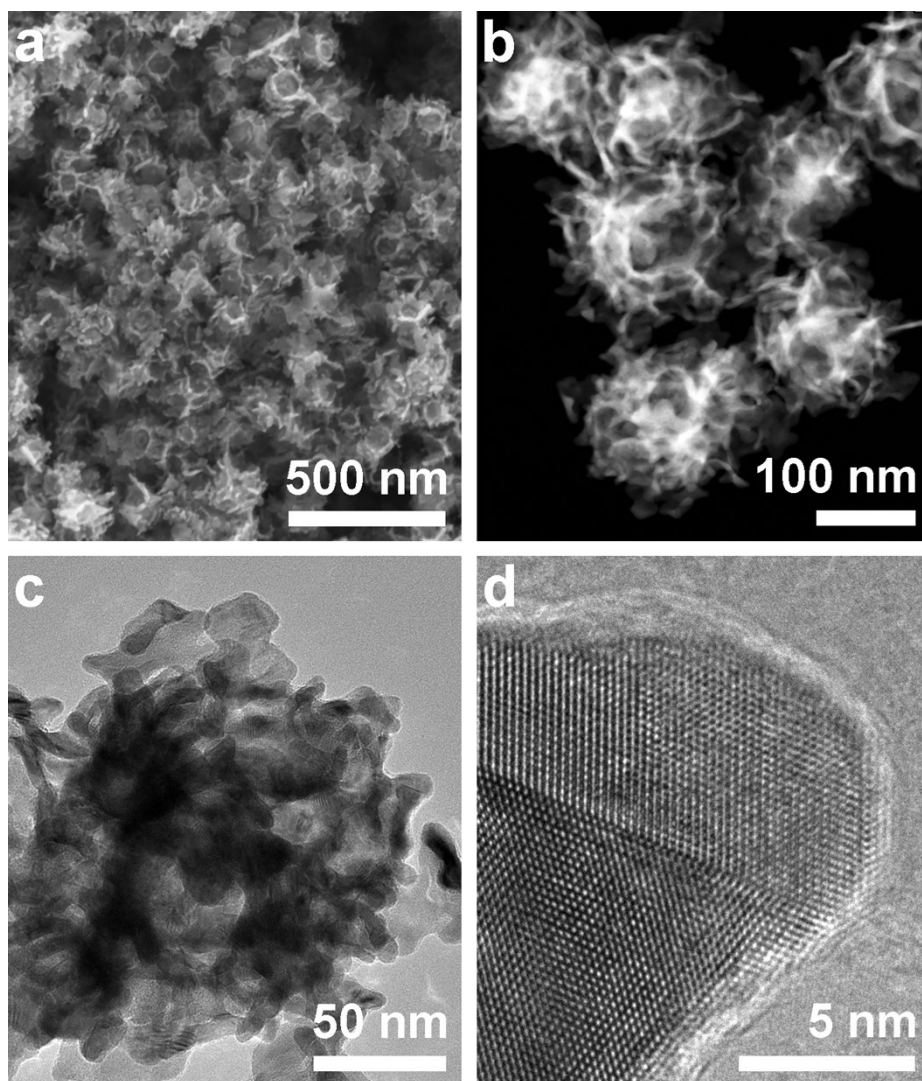

**Figure S10** (a) SEM, (b) HAADF-STEM, (c) TEM and (d) HRTEM images of the meso-Pd NPs.

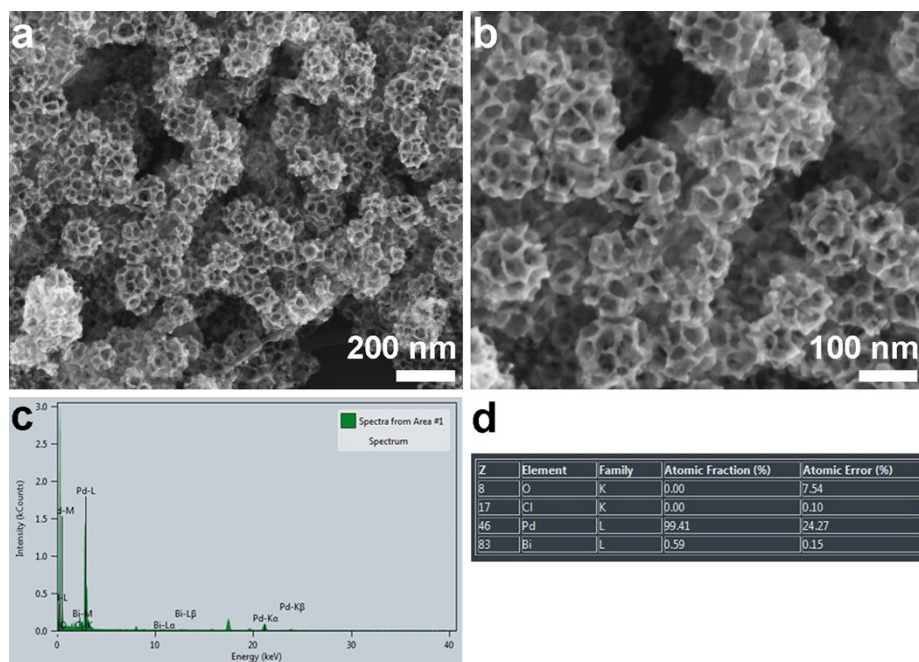

**Fig. S11** (a, b) SEM images and (c) EDS result of the meso-PdBi nanocages after *i-t* measurement in 1.0 M KOH containing 1.0 M C<sub>2</sub>H<sub>5</sub>OH. (d) The corresponding atomic ratios of different elements derived from EDS analysis.

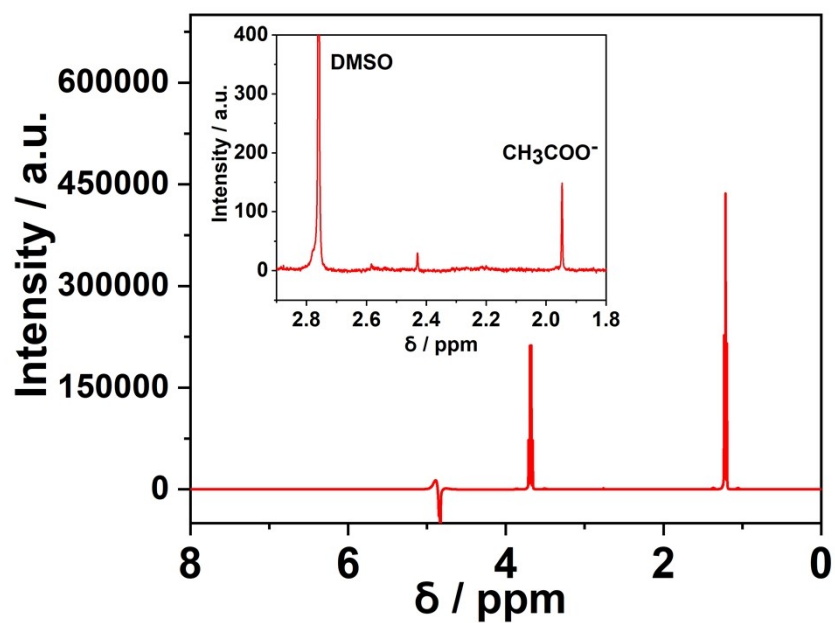

**Figure S12** Representative <sup>1</sup>H-NMR spectra of the electrolyte after EOR catalyzed by meso-PdBi nanocages at -0.1 V vs. SCE for 1.0 h. DMSO is used as an internal standard for quantification of CH<sub>3</sub>COO<sup>-</sup> and HCOO<sup>-</sup>.

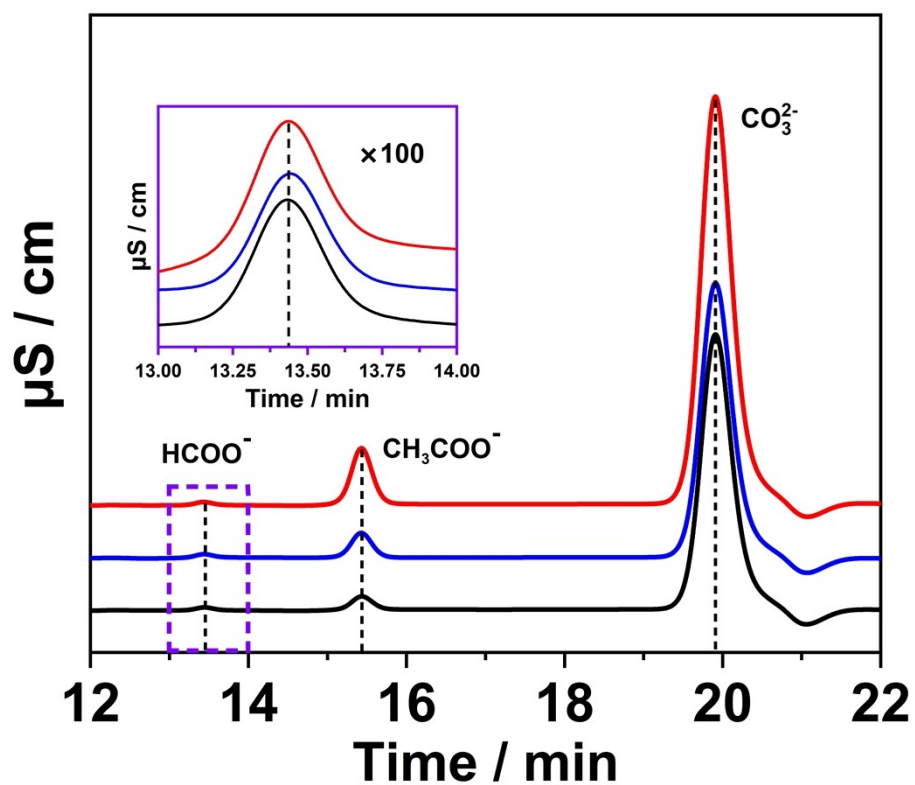

**Figure S13** Representative ion chromatographic spectra of the electrolyte after EOR catalyzed by meso-PdBi nanocages (red), meso-Pd NPs (blue) and PdB (black) at  $-0.1$  V vs. SCE for 1.0 h. The inset shows a magnification of  $\text{HCOO}^-$  peaks.

**Table S1** Comparison of EOR performance. The data was derived from **Fig. 5c-f**.

| <b>Sample Name</b>  | <b>Slope (mA/(V s<sup>-1</sup>)<sup>1/2</sup>)</b> | <b>R<sup>2</sup></b> |
|---------------------|----------------------------------------------------|----------------------|
| meso-PdBi nanocages | 96.77                                              | 0.999                |
| meso-Pd NPs         | 54.80                                              | 0.998                |
| PdB                 | 29.89                                              | 0.998                |

**Table S2** Comparison of EOR performances of meso-PdBi nanocages with previously reported catalysts.

| Sample name                                  | Electrolyte                                              | Scan rate (mV s <sup>-1</sup> ) | Mass activity (A mg <sup>-1</sup> _Pd) | Specific activity (mA cm <sup>-2</sup> ) | C1 Selectivity | References |
|----------------------------------------------|----------------------------------------------------------|---------------------------------|----------------------------------------|------------------------------------------|----------------|------------|
| Meso-PdBi nanocages                          | 1.0M KOH +<br>1.0 M<br>C <sub>2</sub> H <sub>5</sub> OH  | 50                              | 3.56                                   | 17.82                                    | 55.7%          | This work  |
| PdCo nanotube array                          | 1.0M NaOH<br>+ 1.0 M<br>C <sub>2</sub> H <sub>5</sub> OH | 50                              | 1.49                                   | --                                       | --             | 1          |
| Pd/TiO <sub>2</sub> nanotube array           | 2.0M KOH +<br>10 wt%<br>C <sub>2</sub> H <sub>5</sub> OH | 50                              | --                                     | 14.1                                     | --             | 2          |
| PdNiP ternary NPs                            | 1.0M NOH +<br>1.0 M<br>C <sub>2</sub> H <sub>5</sub> OH  | 100                             | 4.95                                   | --                                       | --             | 3          |
| Tetrahexahedra 1 Pd NCs                      | 0.1M NaOH<br>+ 0.1 M<br>C <sub>2</sub> H <sub>5</sub> OH | 10                              | --                                     | 3.83                                     | --             | 4          |
| Pd icosahedra                                | 0.1M NaOH<br>+ 1.0 M<br>C <sub>2</sub> H <sub>5</sub> OH | 50                              | --                                     | 0.8                                      | --             | 5          |
| Pd/C                                         | 1.0M NaOH<br>+ 1.0 M<br>C <sub>2</sub> H <sub>5</sub> OH | 50                              | --                                     | 16                                       | --             | 6          |
| Ordered Pd <sub>2</sub> Ge intermetallic NPs | 1.0M KOH +<br>1.0 M<br>C <sub>2</sub> H <sub>5</sub> OH  | 50                              | --                                     | 4.1                                      | --             | 7          |
| Ternary PdBP mesoporous NSs                  | 1.0M KOH +<br>1.0 M<br>C <sub>2</sub> H <sub>5</sub> OH  | 50                              | 3.65                                   | --                                       | --             | 8          |
| PdBi single-atom alloy aerogels              | 1.0M KOH +<br>1.0 M<br>C <sub>2</sub> H <sub>5</sub> OH  | 50                              | 5.5                                    | --                                       | 0.0%           | 9          |
| SnO <sub>2</sub> -Rh nanosheets              | 0.1M KOH +<br>0.5 M<br>C <sub>2</sub> H <sub>5</sub> OH  | 50                              | --                                     | --                                       | 72.8%          | 10         |
| Ag@Pd <sub>2</sub> P <sub>0.2</sub>          | 1.0M KOH +<br>1.0 M<br>C <sub>2</sub> H <sub>5</sub> OH  | 50                              | 7.24                                   | 6.68                                     | 19.0%          | 11         |



## References

- [1] A.-L. Wang, X.-J. He, X.-F. Lu, H. Xu, Y.-X. Tong, G.-R. Li, *Angew. Chem. Int. Ed.* **2015**, *54*, 3669-3676.
- [2] Y.-X. Chen, A. Lavacchi, S.-P. Chen, F. Benedetto, M. Bevilacqua, C. Bianchini, P. Fornasiero, M. Innocenti, M. Marelli, W. Oberhauser, S.-G. Sun, F. Vizza, *Angew. Chem. Int. Ed.* **2012**, *51*, 8500-8504.
- [3] L. Chen, L. Lu, H. Zhu, Y. Chen, Y. Huang, Y. Li, L. Wang, *Nat. Commun.* **2017**, *8*, 14136.
- [4] N. Tian, Z.-Y. Zhou, N.-F. Yu, L.-Y. Wang, S.-G. Sun, *J. Am. Chem. Soc.* **2010**, *132*, 7580-7581.
- [5] G. Fu, X. Jiang, L. Tao, Y. Chen, J. Lin, Y. Zhou, Y. Tang, T. Lu, *T. Langmuir* **2013**, *29*, 4413-4420.
- [6] G. Cui, S. Song, P. Shen, A. Kowal, C. Bianchini, *J. Phys. Chem. C* **2009**, *113*, 15639-15642.
- [7] S. Sarkar, R. Jana, Suchitra, U. V. Waghmare, B. Kuppan, S. Sampath, S. C. Peter, *Chem. Mater.* **2015**, *27*, 7459-7476.
- [8] H. Lv, D. Xu, L. Sun, J. Henzie, S. L. Suib, Y. Yamauchi, B. Liu, *ACS Nano* **2019**, *13*, 12052-12061.
- [9] H. Wang, L. Jiao, L. Zheng, Q. Fang, Y. Qin, X. Luo, X. Wei, L. Hu, W. Gu, J. Wen, C. Zhu, *Adv. Funct. Mater.* **2021**, 2103465.
- [10] S. Bai, Y. Xu, K. Cao, X. Huang, *Adv. Mater.* **2020**, 2005767.
- [11] X. Yang, Z. Liang, S. Chen, M. Ma, Q. Wang, X. Tong, Q. Zhang, J. Ye, L. Gu, N. Yang, *N. Small* **2020**, *16*, 2004727.
